# Supplementary material
Source: publisher site journal article supplement (https://www.dovepress.com/article/449186)
Supplement: Supplementary file 1 [file get_supplementary_file.php]

**Supplementary table1 Low-lectin diet's dietary plan**

| Phase 1 (Detoxification Phase) | 1.Opt for vegetables, a small amount of fish or chicken, and foods made with oils like perilla seed, avocado, and sesame. 2.Avoid dairy, grains, fruits, sugar, seeds, corn, soy, beef, and other farmed meats. 3.Exclude staples like rice and millet from your diet. | 3 days |
| --- | --- | --- |
|
|
|
|
| Phase 2 (Repair Phase) | 1.Advised to adopt a diet favoring beneficial foods and avoiding harmful foods. 2.Prefer using perilla seed oil and coconut oil for cooking,Exclude wheat products, meat from animals raised with artificial feed, potatoes, corn, legumes, various bean oils, and peanut oil.  3.consider using supplements like probiotics and vitamin D. | 6 weeks |
|
|
|
|
| Phase 3 (Recovery Process) | 1.Maintain a diet with beneficial foods while avoiding harmful ones. 2.Weekly, introduce a previously restricted food and assess your response before deciding to keep it in your diet. 3.Gradually reduce animal protein intake to 50-100g per day. 4.Keep taking the Phase 2 recommended supplements. | 2 weeks or longer |
|
|
|
|

1.If Phase 1 is challenging, you can either relax the requirements or skip to Phase 2.
2.Get at least 1 hour of sunlight daily and sleep 8 hours each night. Reduce nighttime blue light exposure.

**Supplementary table2 Low-lectin diet's food List**

|  | | Beneficial Foods | Harmful Foods |
| --- | --- | --- | --- |
| Staples | | Rice, millet, sorghum, potatoes, purple sweet potatoes, taro, yams (without preservatives) | Wheat,Flour,Oats,Quinoa,Brown rice,Wild rice,Barley,Buckwheat,Corn/Corn products. |
|
| Fish | | Wild freshwater fish (not artificially fed): bass, crucian carp, etc. Deep-sea fish that are not artificially farmed, such as mackerel, john dory, cod, tuna, sardines, salmon, etc. | Deep-sea carnivorous fish, artificially fed fish. |
|
| Meats | | Grass-fed beef, lamb; pork from non-feed-fed animals, free-range chicken, duck, goose, such as free-range chicken. | Meat from livestock raised on feed. |
|
| Eggs | | Eggs from poultry that are not fed with corn, rice, and other grain feed. | Eggs from livestock raised on feed. |
|
| Vegetables | | Leafy greens, mustard greens, celery, coriander, cabbage, kale, seaweed, kelp, radishes (carrots, white radishes, red radishes, green radishes), mushrooms, onions, broccoli, cauliflower, yam, leeks, okra, asparagus. | Tomatoes, eggplants, potatoes,all leguminous plants, including bean sprouts and soy products. |
|
| Seasonings | Oils | Perilla seed oil, olive oil, coconut oil, avocado oil, walnut oil, sesame oil. | Soybean oil, corn oil, peanut oil, sunflower seed oil, rapeseed oil |
| Sugars | Moderate amounts of white sugar, rock sugar, stevia, xylitol. | Saccharin,Nutrasweet，Sweet'N Low，Maltodextrin. |
| Salt | Iodized salt. | Nor |
| Vinegar | Vinegar without added sugar. | Nor |
| Spices | onions, scallions, ginger, garlic, star anise, cinnamon, and all spices except for chili. | Chili peppers (mainly chili seeds) |
| Fruits | | Avocado, blueberries, strawberries, pomegranates, kiwi, apples, oranges, plums, dates, figs, and seasonal fruits. | Cucumbers,gourds,tomatoes. |
|
| Nuts | | Walnuts, pistachios, hazelnuts, chestnuts, pine nuts (not recommended in large quantities). | Pumpkin seeds, sunflower seeds, chia seeds, peanuts, cashews. |
|
| Snacks | | Dark chocolate (72% cocoa or higher), goat's milk, buffalo milk, sheep milk products, yogurt, A2 milk. | Cakes, pastries,biscuits, bread, junk food. |
|
